# Supplementary material for: Enhanced inflammation and attenuated tumor suppressor pathways are associated with oncogene‐induced lung tumors in aged mice
Source: PubMed Central journal article supplement (PMC5771401; doi:10.1111/acel.12691), 2017-10-18

# Supplementary Figure S1

**A**

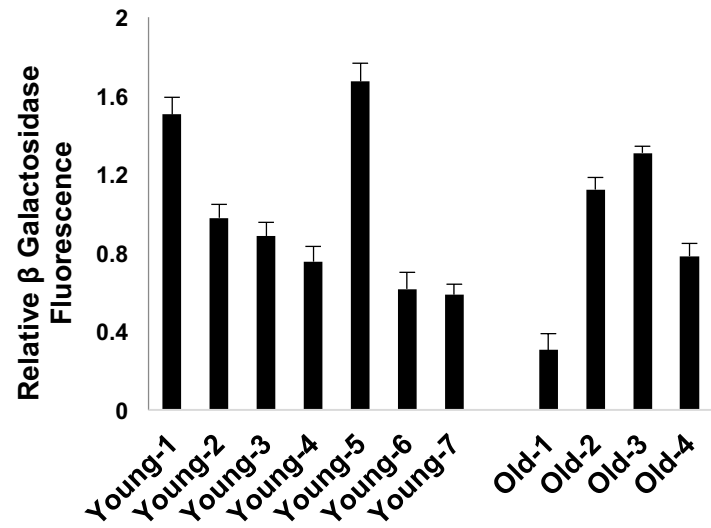

**B**

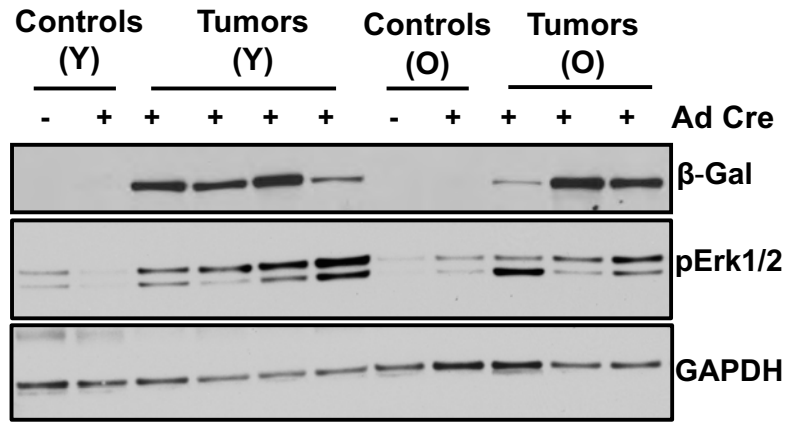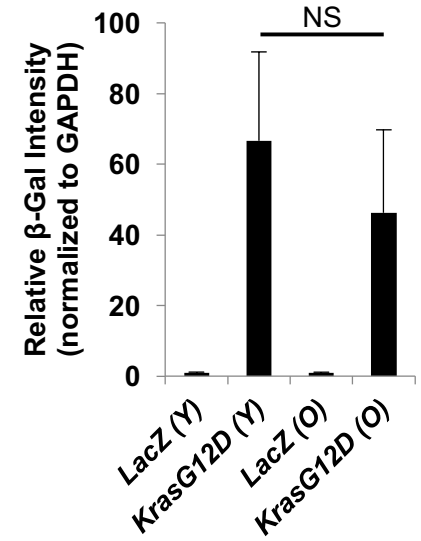

**C**

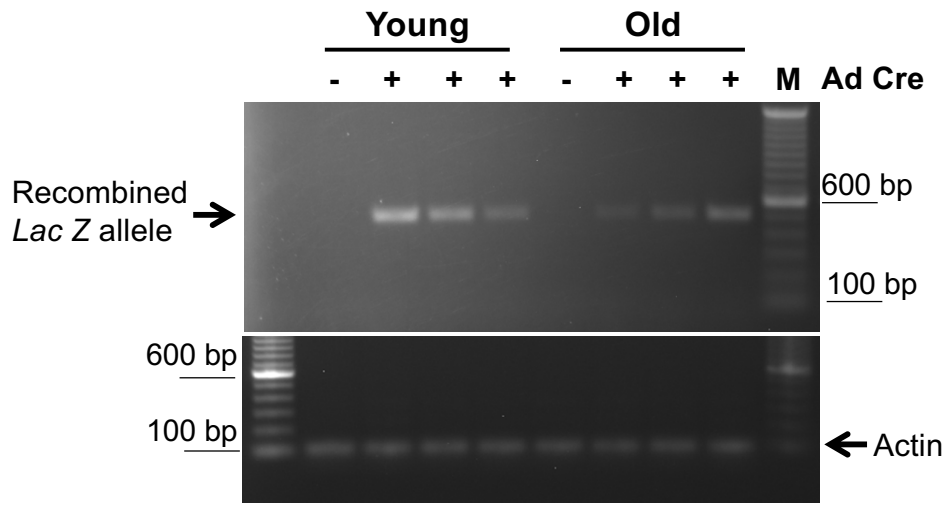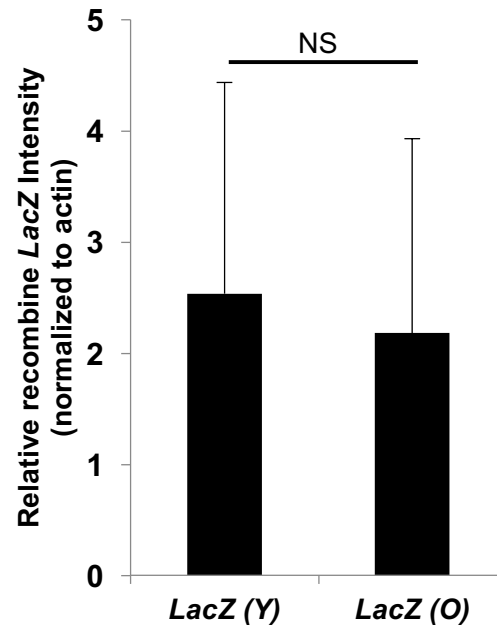

# Supplementary Figure S2

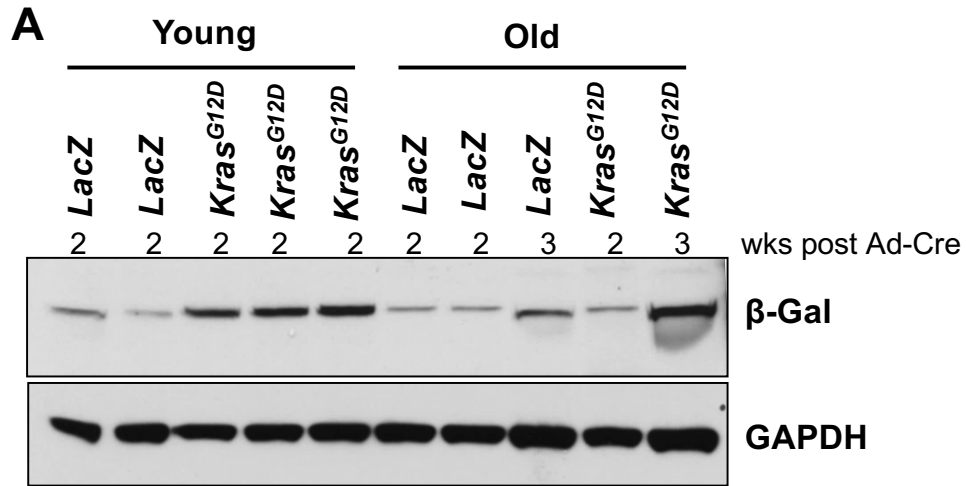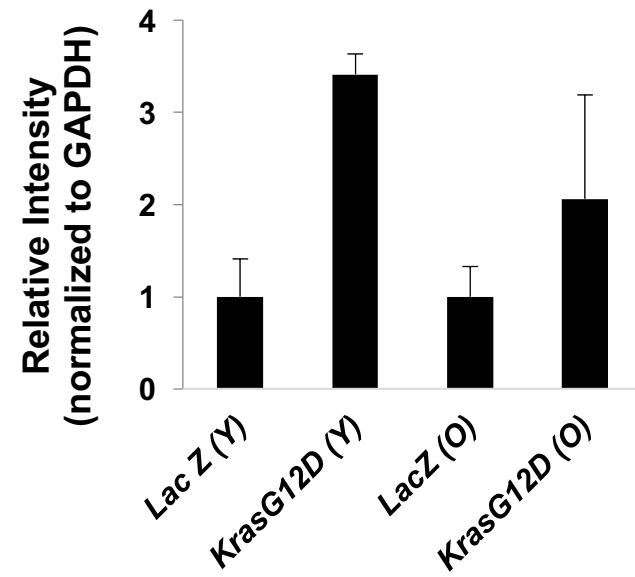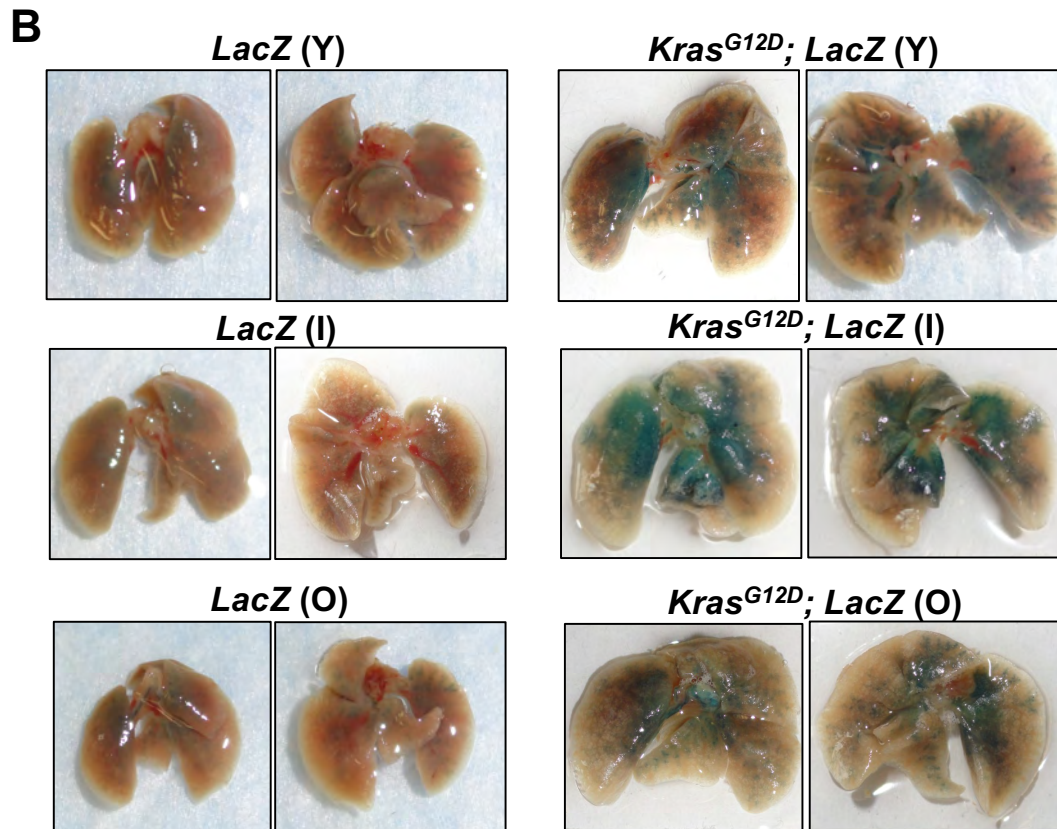

Supplementary Figure S3

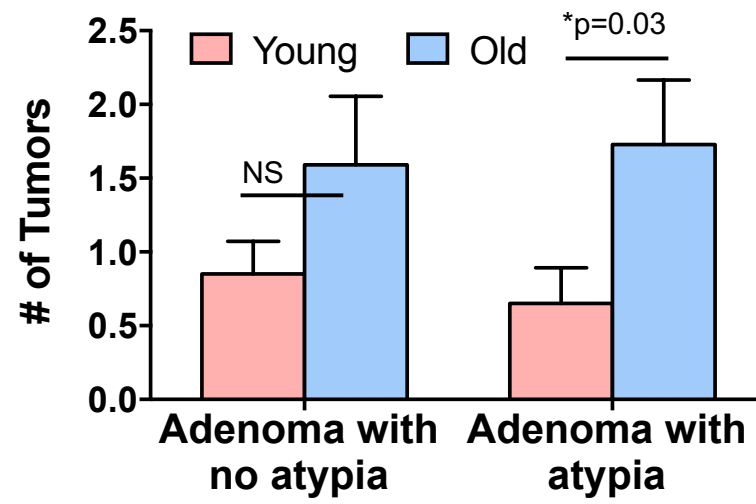

# Supplementary Figure S4

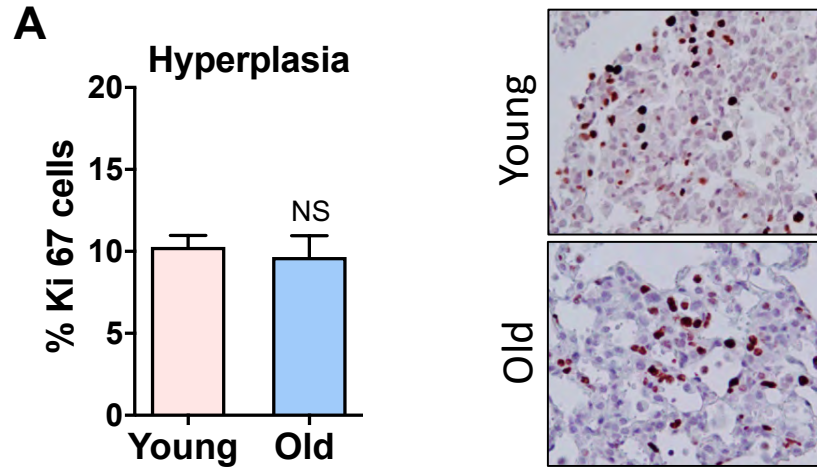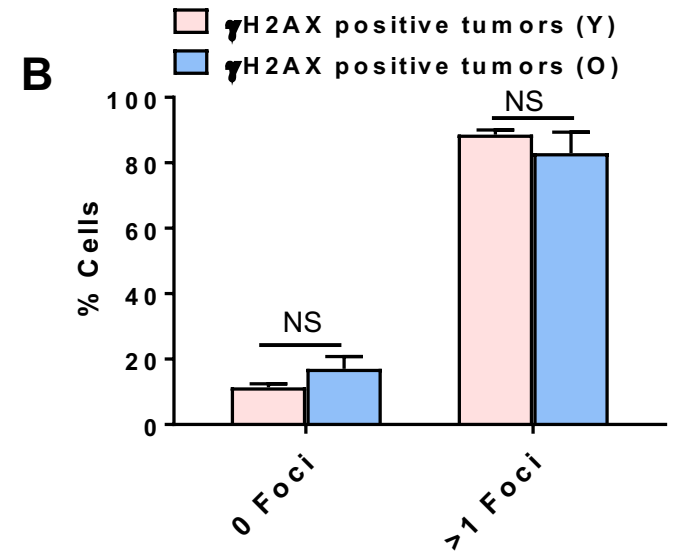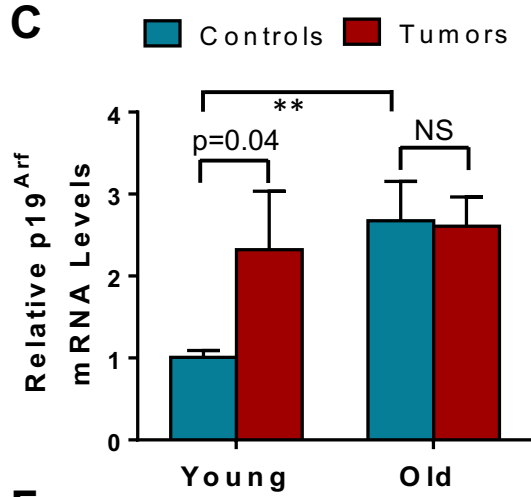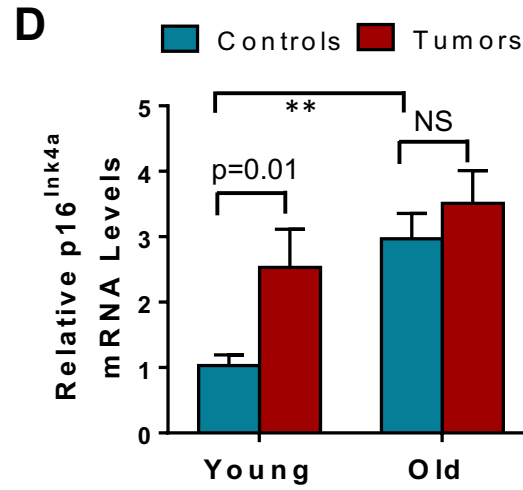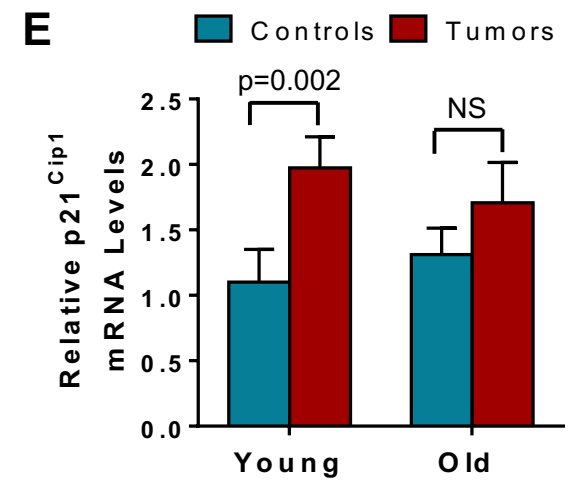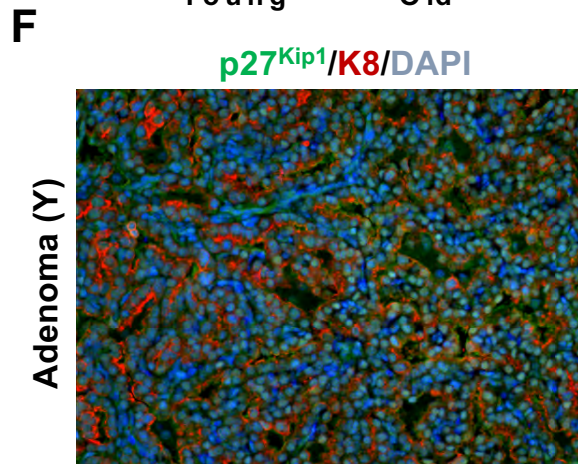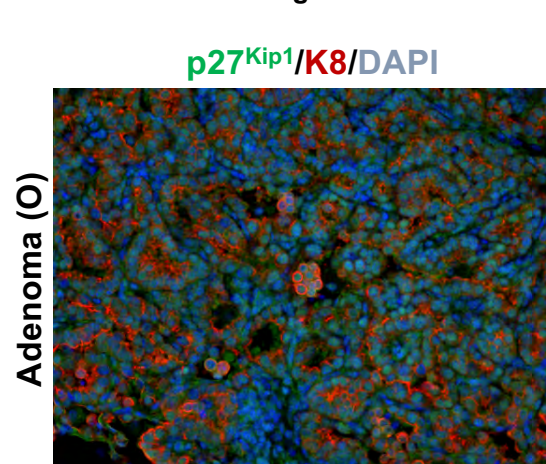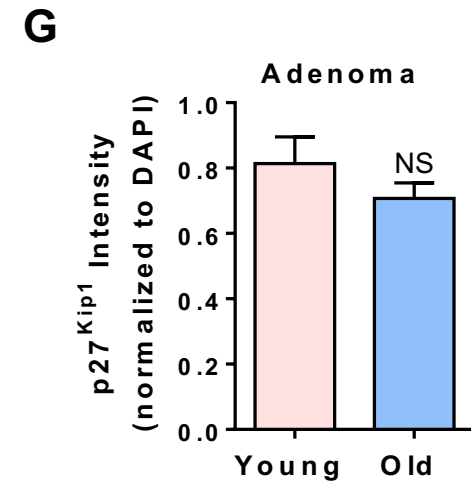

# Supplementary Figure S5

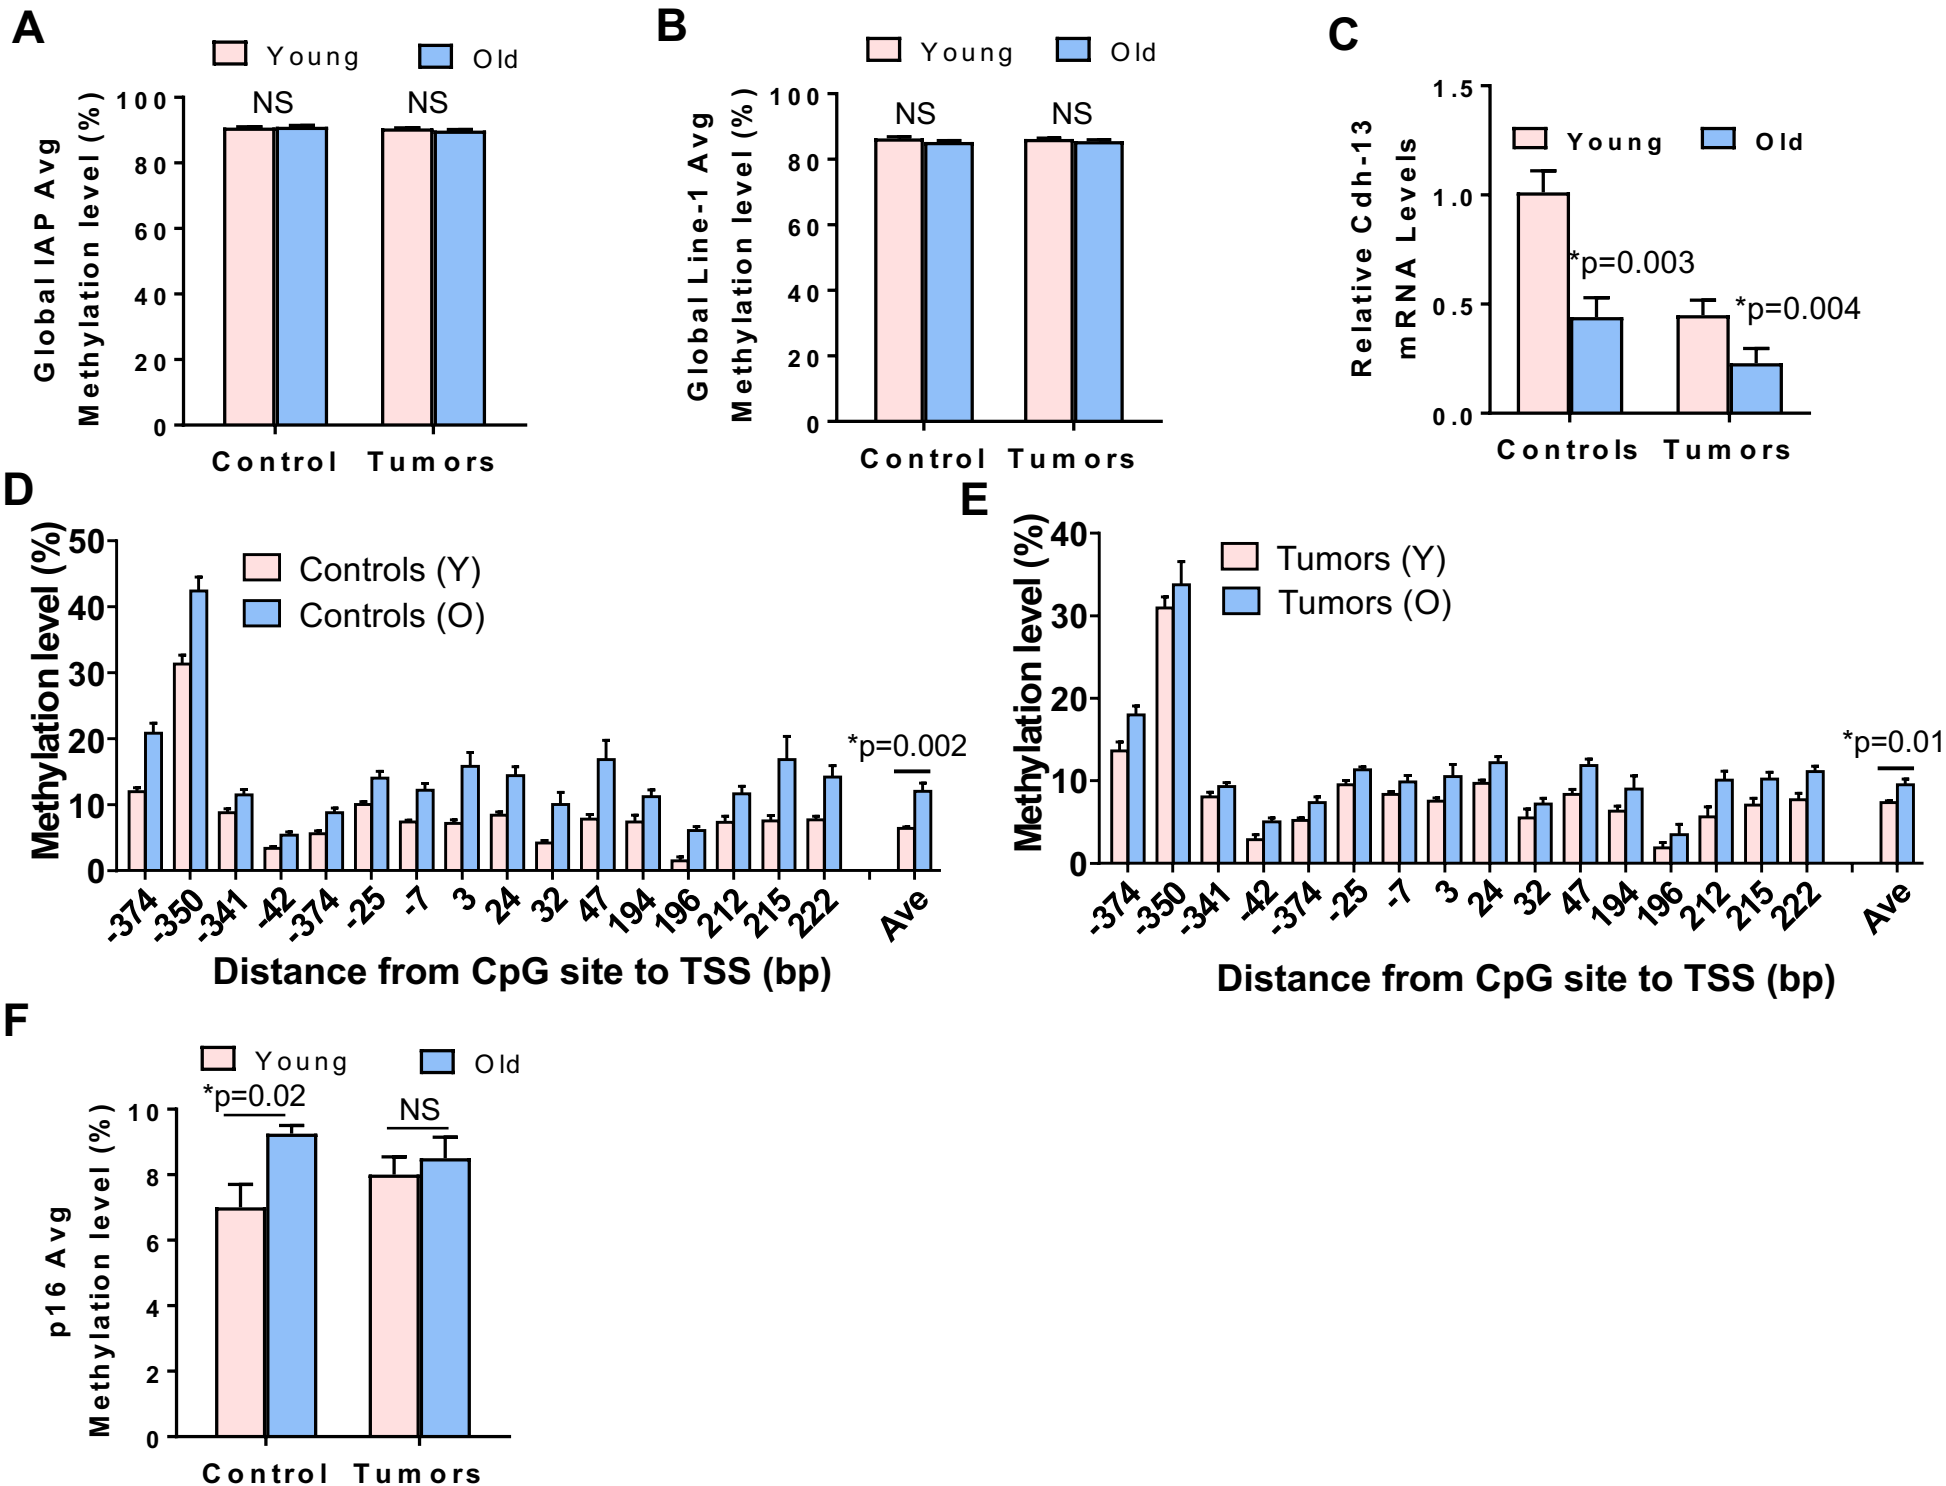

Supplementary Figure S6

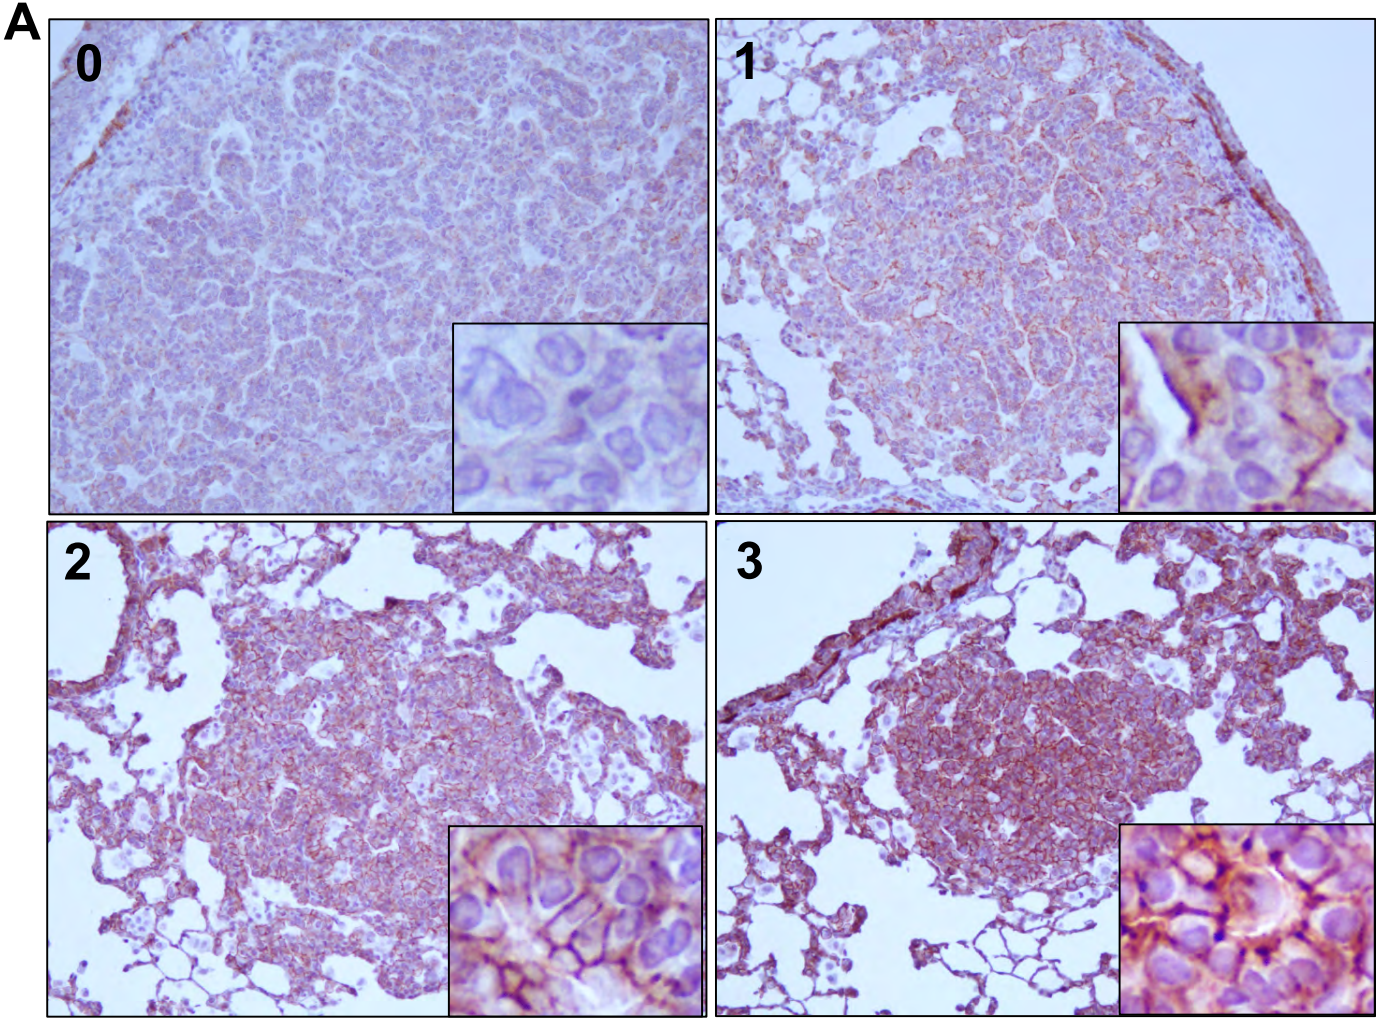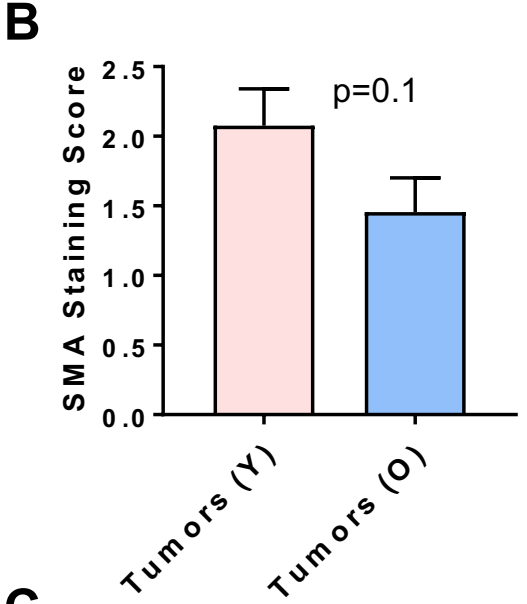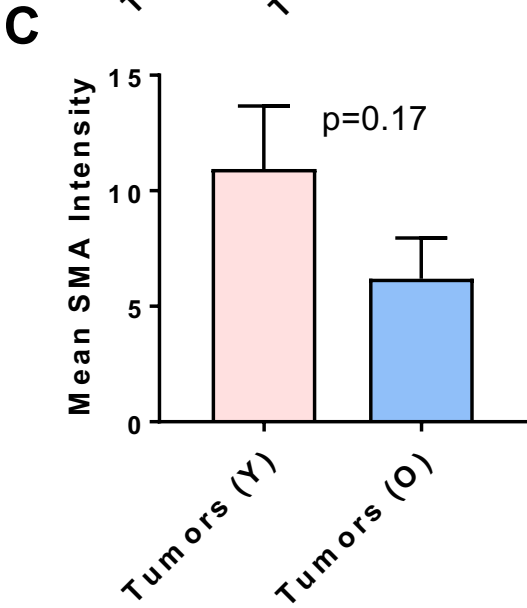

Supplementary Figure S7

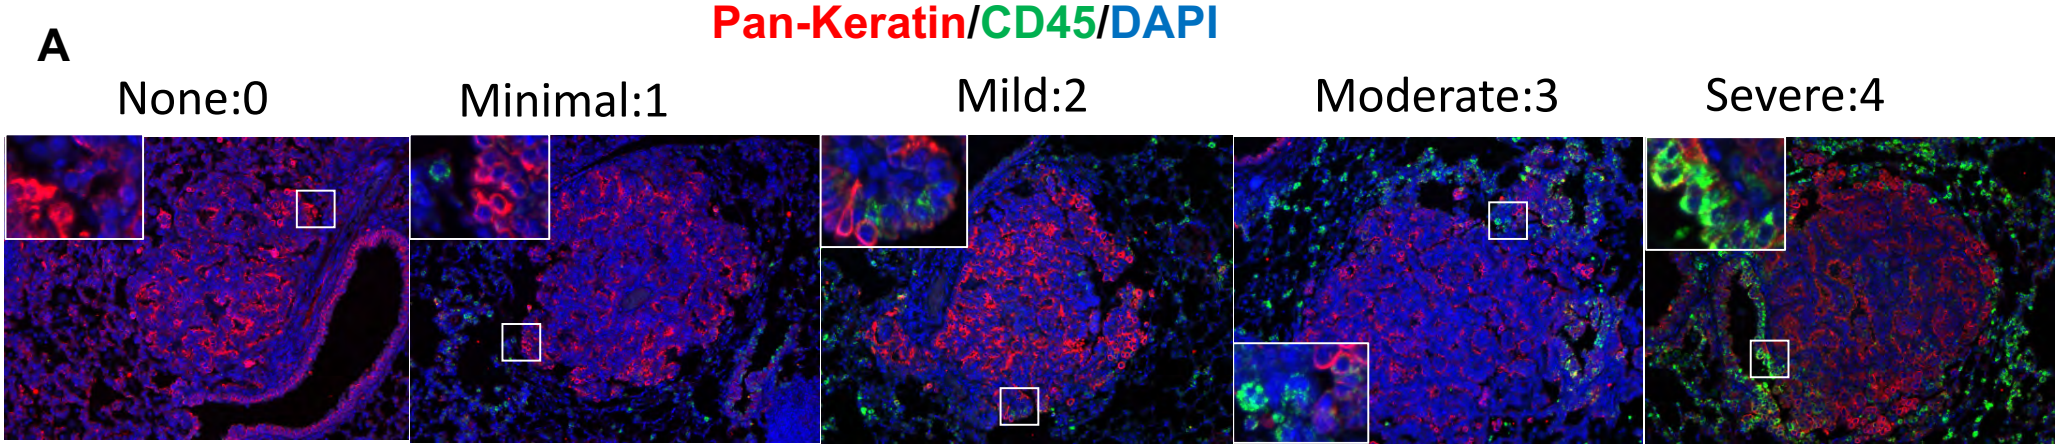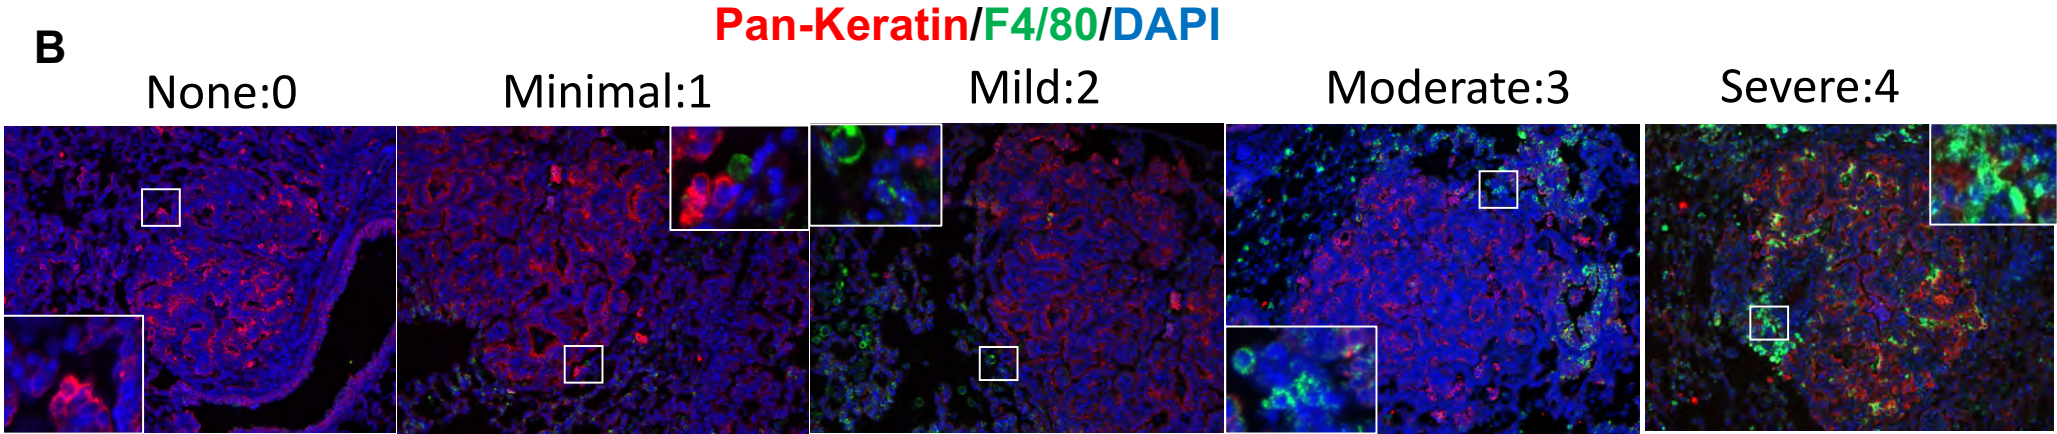

# Supplementary Figure S8

**A**

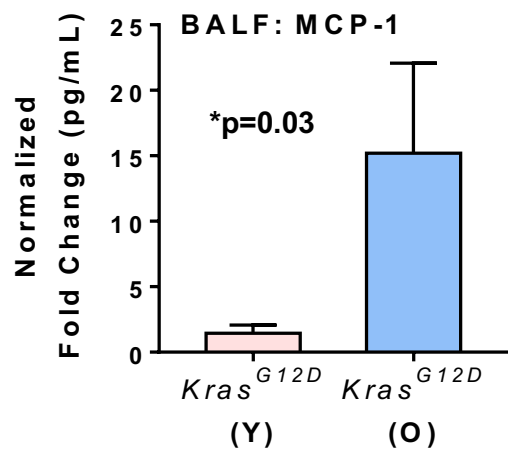

**B**

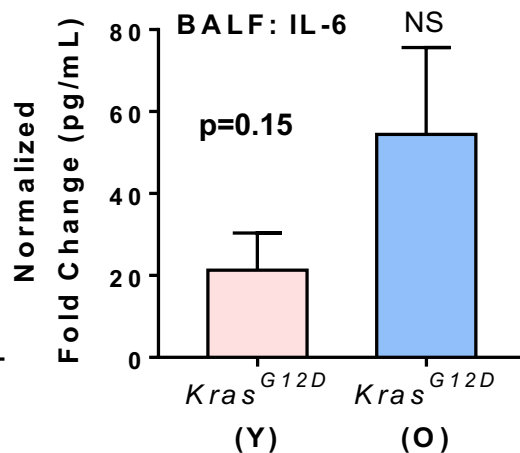

**C**

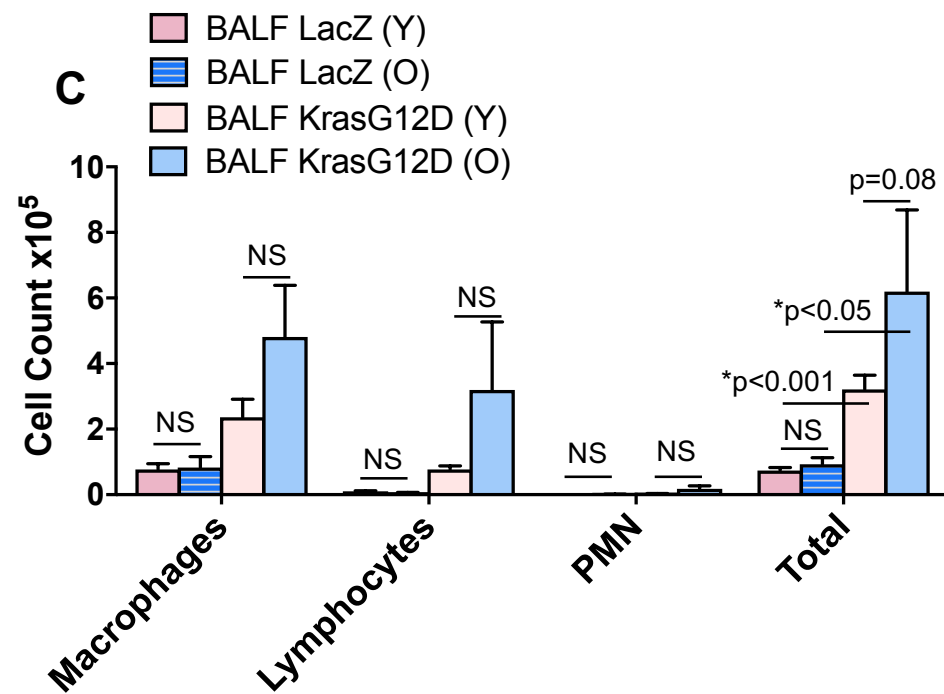

**D**

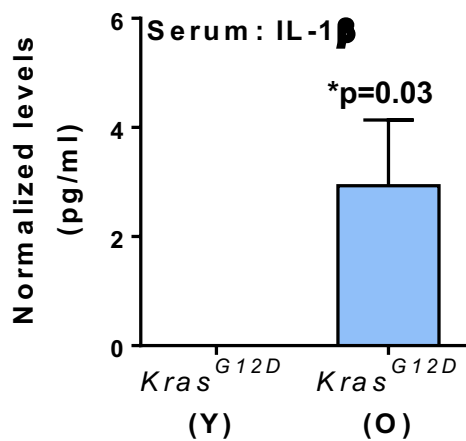

**E**

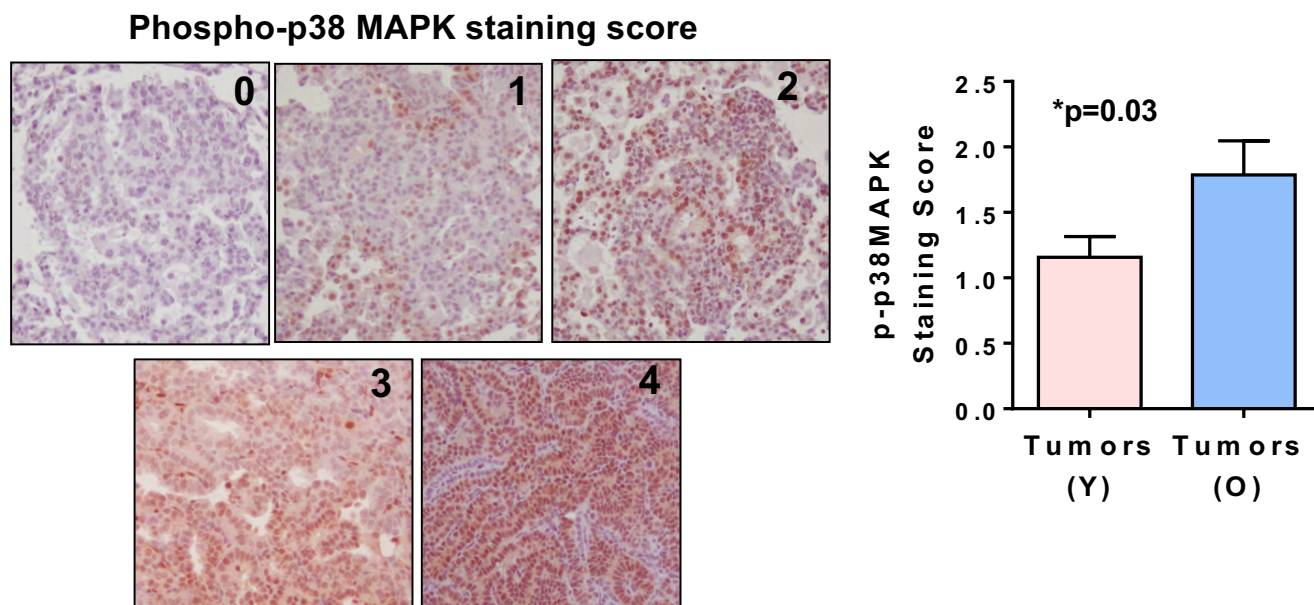



# Supplementary Figure S9

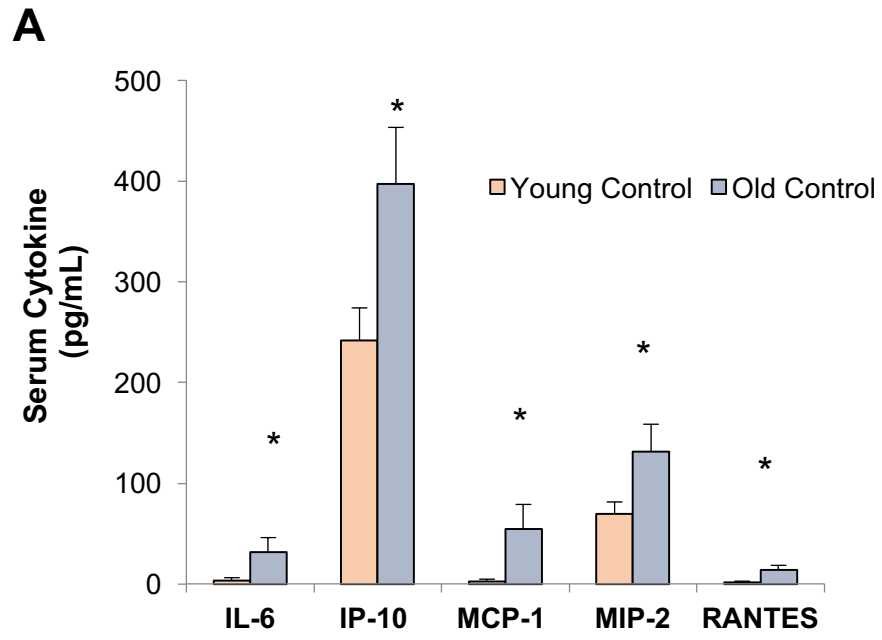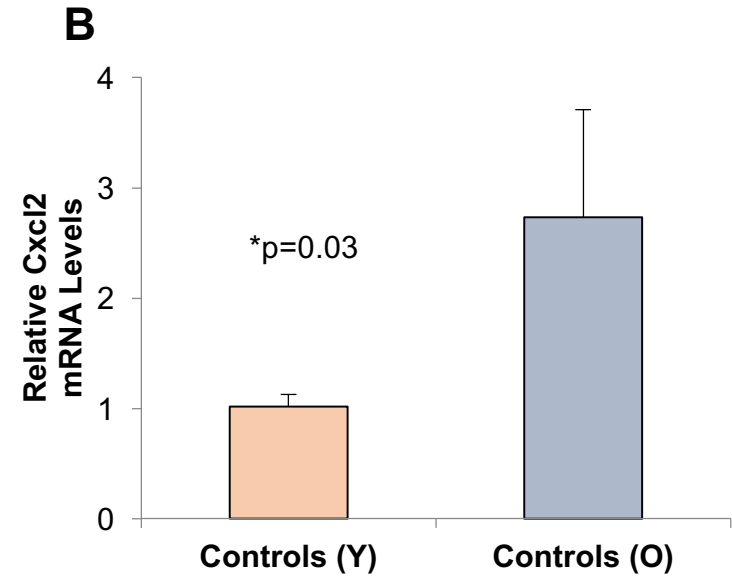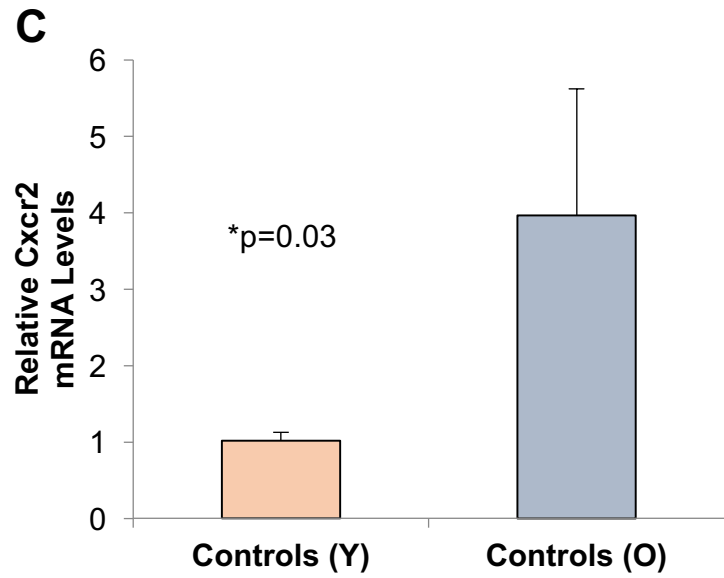

Supplementary Figure S10

## Cell Intrinsic Mechanisms

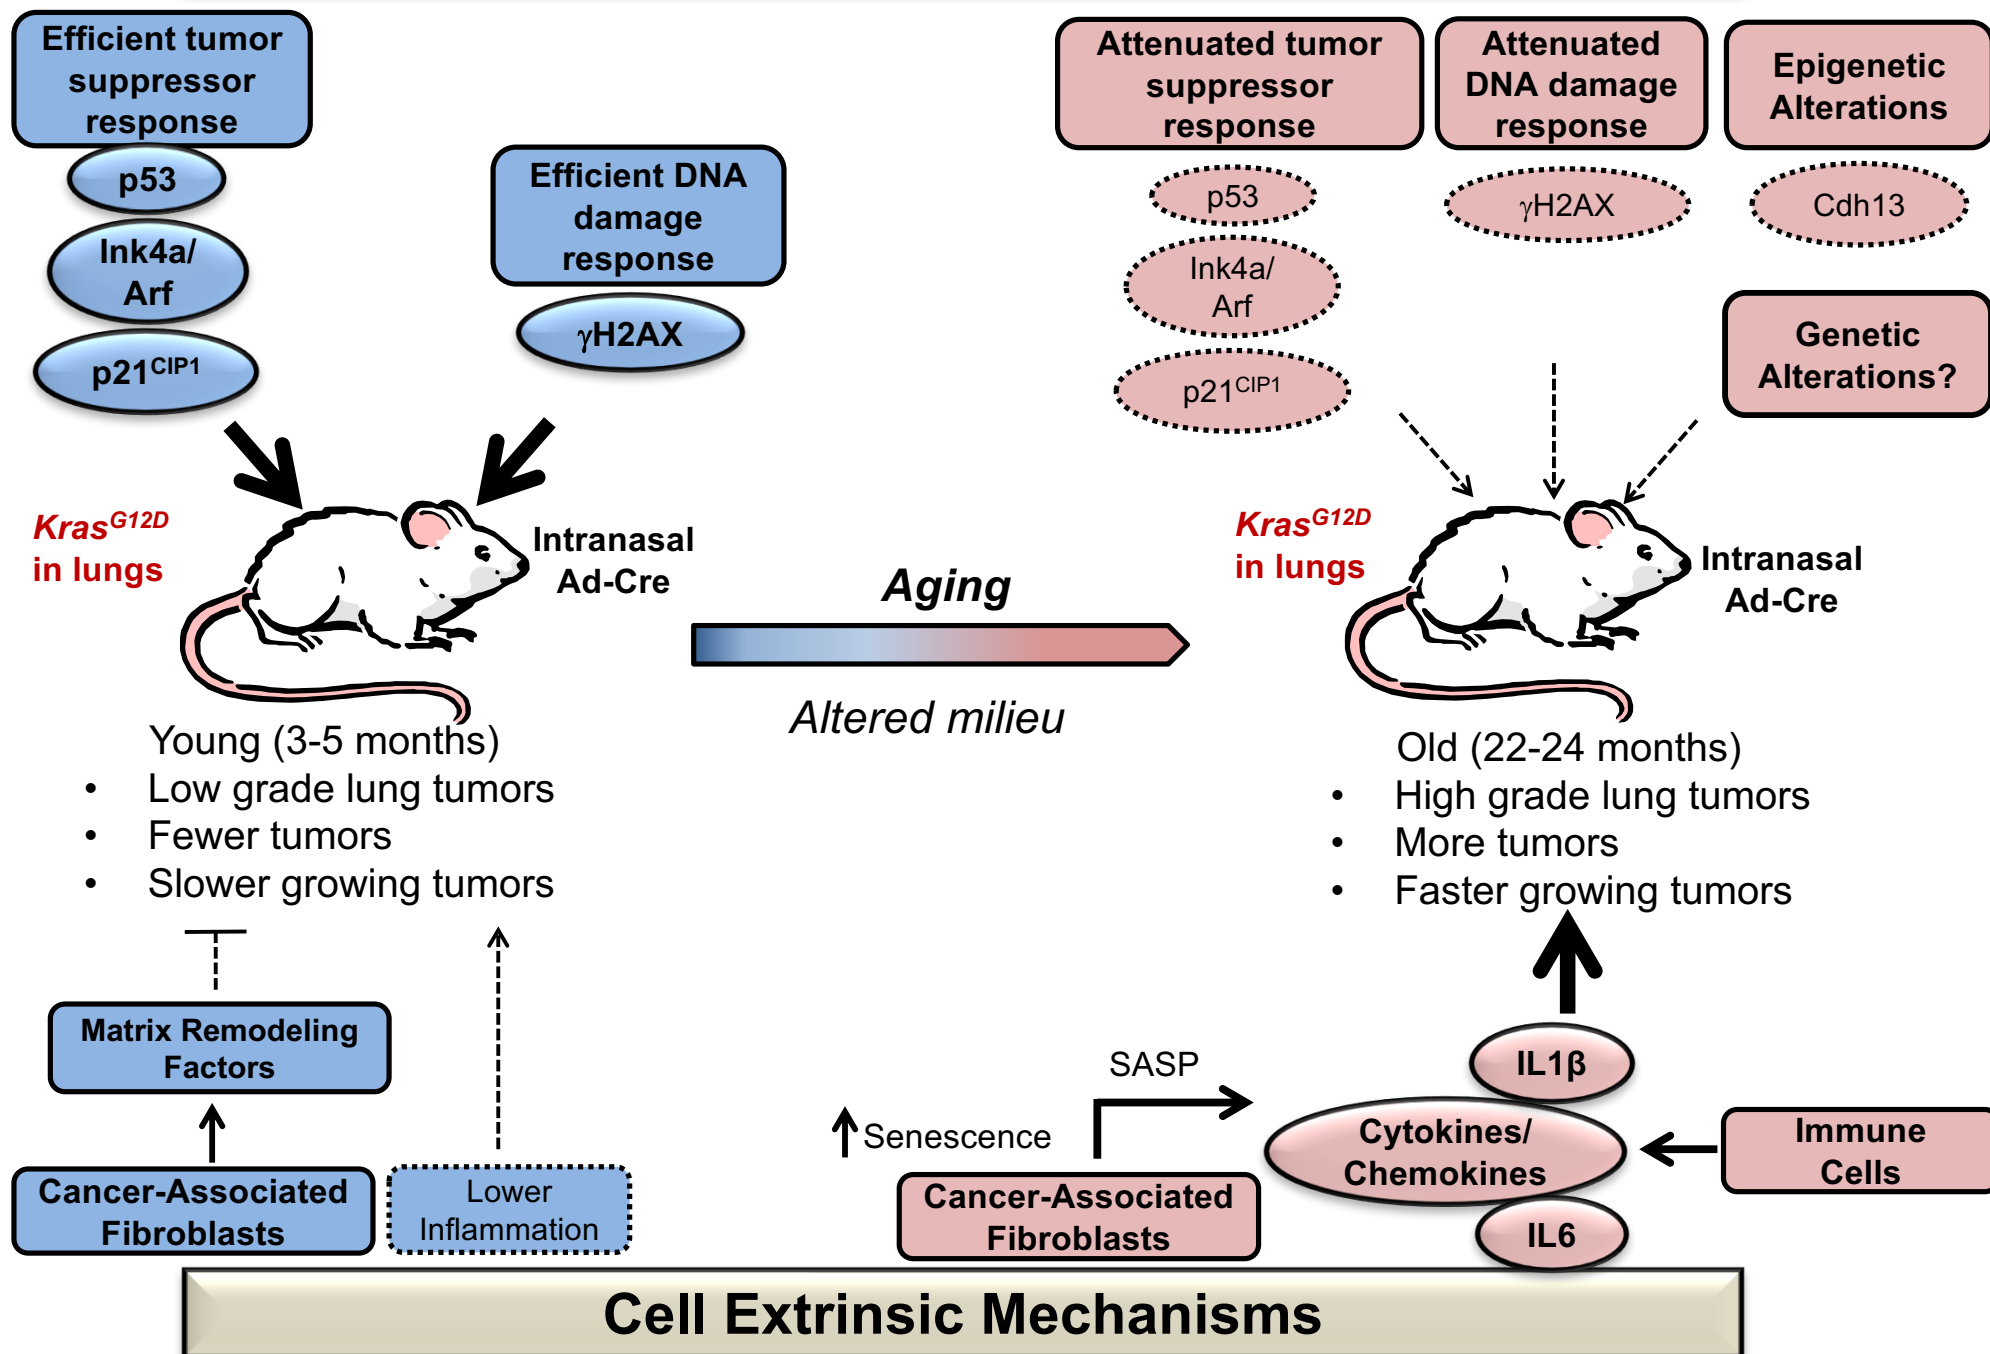

Supplement: ACEL-17-na-s001.pdf [file ACEL-17-na-s001.pdf]
